# Supplementary material for: Highly active and durable WO3/Al2O3catalysts for gas-phase dehydration of polyols
Source: Royal Society of Chemistry journal article supplement (doi:10.1039/d0ra08340b), 2020-01-01
Supplement: d0ra08340b1.pdf [file d0ra08340b1.pdf]

Supporting Information

Highly Active and Durable WO<sub>3</sub>/Al<sub>2</sub>O<sub>3</sub> Catalysts for Gas-phase Dehydration of Polyols

Takeshi Aihara<sup>a</sup>, Katsuya Asazuma<sup>a</sup>, Hiroki Miura<sup>a,b,d</sup>, and Tetsuya Shishido<sup>a,b,c,d\*</sup>

<sup>a</sup> Department of Applied Chemistry for Environment, Graduate School of Urban Environmental Sciences, Tokyo Metropolitan University, 1-1 Minami-Osawa, Hachioji, Tokyo 192-0397, Japan

<sup>b</sup> Research Center for Hydrogen Energy-based Society, Tokyo Metropolitan University, 1-1 Minami-Osawa, Hachioji, Tokyo 192-0397, Japan

<sup>c</sup> Research Center for Gold Chemistry, Tokyo Metropolitan University, 1-1 Minami-Osawa, Hachioji, Tokyo 192-0397, Japan

<sup>d</sup> Elements Strategy Initiative for Catalysts & Batteries, Kyoto University, Katsura, Nishikyo-ku, Kyoto 615-8520, Japan

\* Corresponding author: Tel: +81-42-677-2850 Fax: +81-42-677-2850 (T. Shishido)

E-mail address: shishido-tetsuya@tmu.ac.jp (T. Shishido)

## **Analytical data**

### **Contents:**

1. IR spectra of pyridine adsorbed on acid sites of  $\text{WO}_3/\text{Al}_2\text{O}_3$  catalysts.
2. Conversion, Yield and Selectivity.
3. Selectivity of acrolein produced from glycerol over various solid acid catalysts.
4. TG analysis of  $\text{WO}_3$  loaded catalysts and zeolites after catalytic run under  $\text{N}_2$ .
5. Dehydration of glycerol over H-ZSM-5 under  $\text{N}_2$  and  $\text{O}_2$ .
6. TG analysis of  $\text{WO}_3/\text{Al}_2\text{O}_3$  and H-ZSM-5 after catalytic cycle under  $\text{O}_2$ .
7.  $\text{NH}_3$ -TPD profiles of  $\text{WO}_3/\text{Al}_2\text{O}_3$  and H-ZSM-5 before and after the reaction under  $\text{N}_2$  and  $\text{O}_2$ .
8. Previous studies on gas-phase dehydration of polyols.

## **References**

### 1. Difference spectra of pyridine adsorbed on acid sites of $\text{WO}_3/\text{Al}_2\text{O}_3$ catalysts

The acidity of  $\text{WO}_3/\text{Al}_2\text{O}_3$  catalysts with various  $\text{WO}_3$  loadings was investigated by adsorbed pyridine on catalysts surface. The bands at 1540 and 1450  $\text{cm}^{-1}$  were attributed to pyridinium ion on Brønsted acid site and pyridine coordinated to Lewis acid site, respectively. The amount of Brønsted and Lewis acidity were estimated from the area of bands at 1540 and 1450  $\text{cm}^{-1}$  and their integrated molar extinction coefficients; 1.67 and 2.22  $\text{cm} \mu\text{mol}^{-1}$ , respectively.<sup>1</sup>

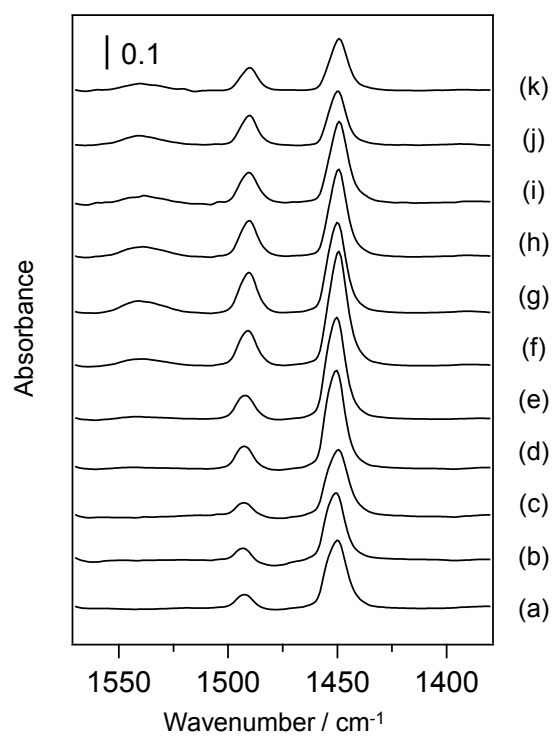

**Figure S1.** Difference spectra of pyridine adsorbed on  $\text{WO}_3/\text{Al}_2\text{O}_3$  catalysts with various  $\text{WO}_3$  loadings. a) 0, b) 2, c) 5, d) 7, e) 10, f) 15, g) 20, h) 25, i) 30, j) 40 and k) 50 wt%  $\text{WO}_3$  loading.

## 2. Conversion, Yield and Selectivity

$$\text{Conversion (\%)} = \frac{\text{sum of moles of all products}}{\text{sum of moles of reactant and all products}} \times 100$$

$$\text{Yield (\%)} = \frac{\text{moles of specific product}}{\text{sum of moles of reactant and all products}} \times 100$$

$$\text{Selectivity (\%)} = \frac{\text{moles of carbon in specific product}}{\text{sum of moles of carbon in reactant and all products}} \times 100$$

3. Selectivity of acrolein produced from glycerol over various solid acid catalysts.

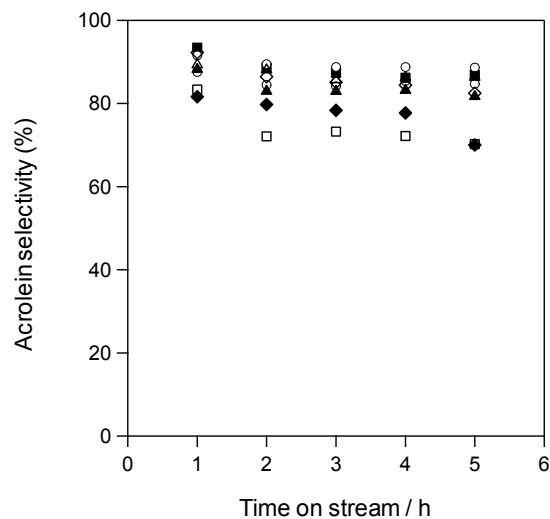

**Figure S2.** Acrolein selectivity of glycerol dehydration over various solid acid catalysts. ●: WO<sub>3</sub>/Al<sub>2</sub>O<sub>3</sub> with 20 wt% WO<sub>3</sub> loading, ▲: WO<sub>3</sub>/ZrO<sub>2</sub> with 10 wt % WO<sub>3</sub> loading, ■: WO<sub>3</sub>/TiO<sub>2</sub> with 2.5 WO<sub>3</sub> wt% loading, ◆: Nb<sub>2</sub>O<sub>5</sub>, ○: H-ZSM-5(90), △: H-β(25), □: H-Y(5.5), ◇: H-MOR(20). Conditions: Catalyst (100 mg), WHSV by glycerol (4.7 h<sup>-1</sup>), T= 588 K.

#### 4. TG analysis of WO<sub>3</sub> loaded catalysts and zeolites.

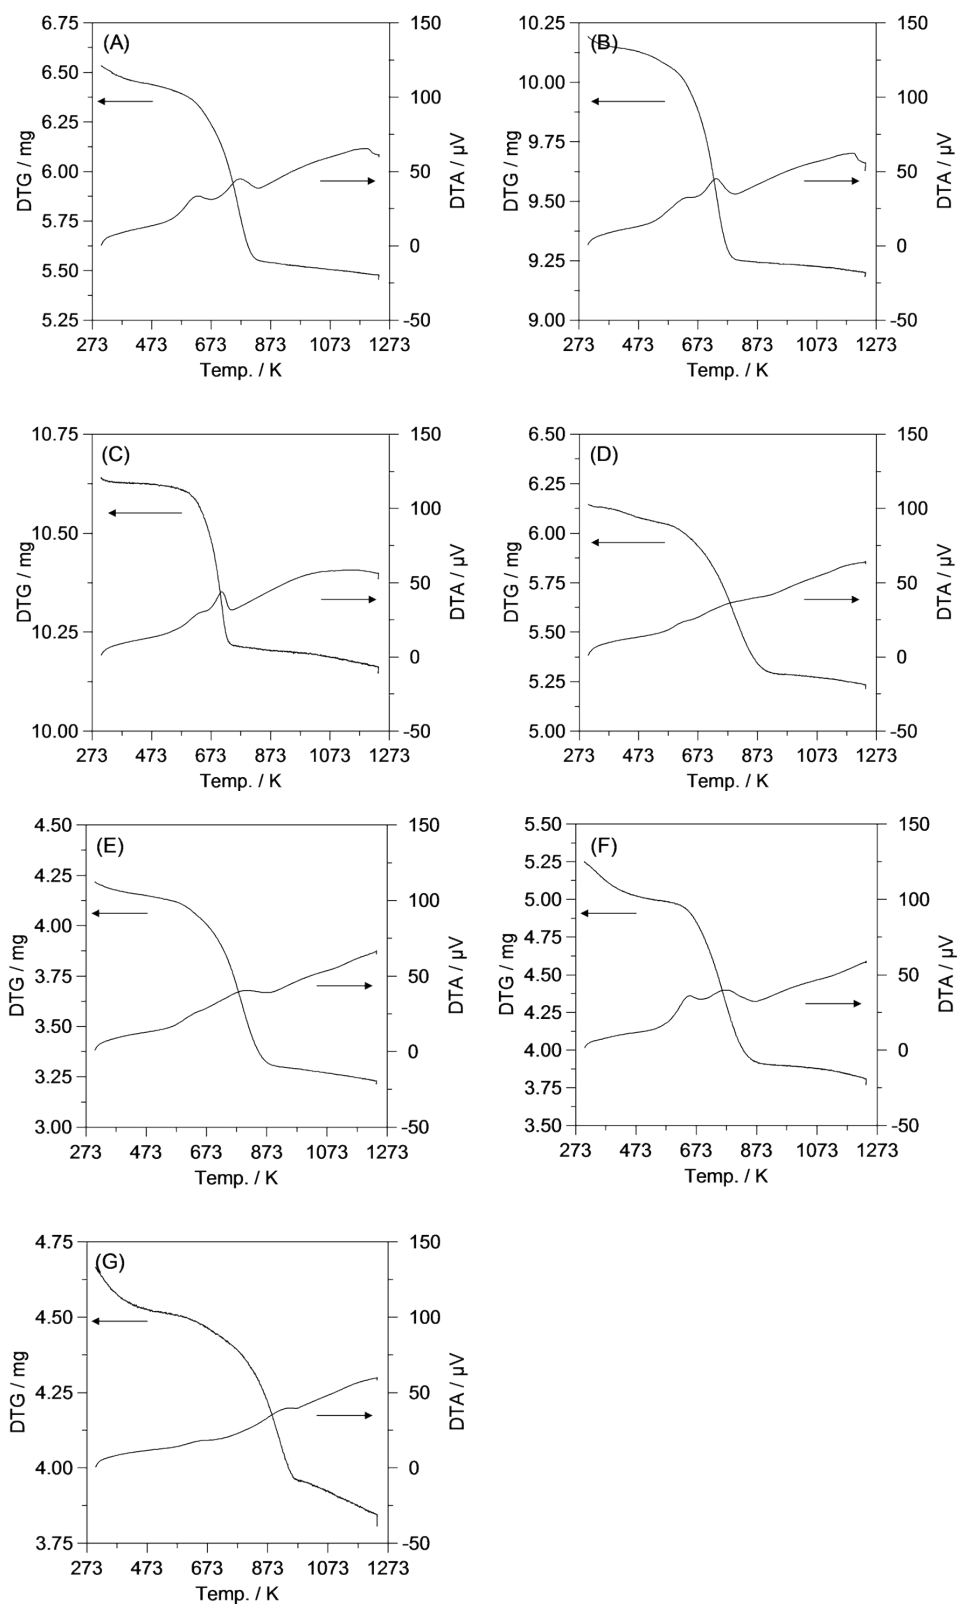

**Figure S3.** TG analysis of various catalysts after using reaction for 5 h. (A) WO<sub>3</sub>/Al<sub>2</sub>O<sub>3</sub> with 20 wt% WO<sub>3</sub> loading, (B) WO<sub>3</sub>/ZrO<sub>2</sub> with 10 wt% WO<sub>3</sub> loading, (C) WO<sub>3</sub>/TiO<sub>2</sub> with 2.5 wt% WO<sub>3</sub> loading, (D) H-ZSM-5(90), (E) H- $\beta$ (25), (F) H-Y(5.5) and (G) H-MOR(20).

5. Dehydration of glycerol over H-ZSM-5 under N<sub>2</sub> and O<sub>2</sub>.

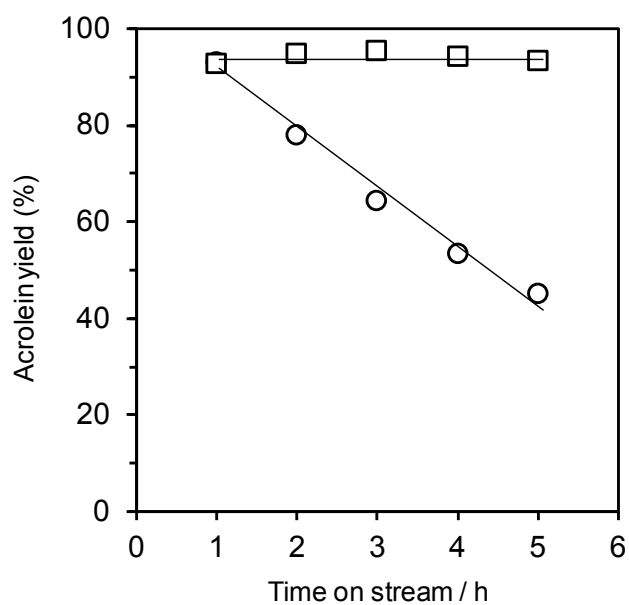

**Figure S4.** Dehydration of glycerol to acrolein over Dehydration of glycerol to acrolein over H-ZSM-5(90) under flowing N<sub>2</sub> (circle) and O<sub>2</sub> (square). Conditions: Catalyst (100 mg), WHSV by glycerol (4.7 h<sup>-1</sup>), *T*= 588 K.

6. TG analysis of  $\text{WO}_3/\text{Al}_2\text{O}_3$  and H-ZSM-5 after catalytic cycle under  $\text{O}_2$ .

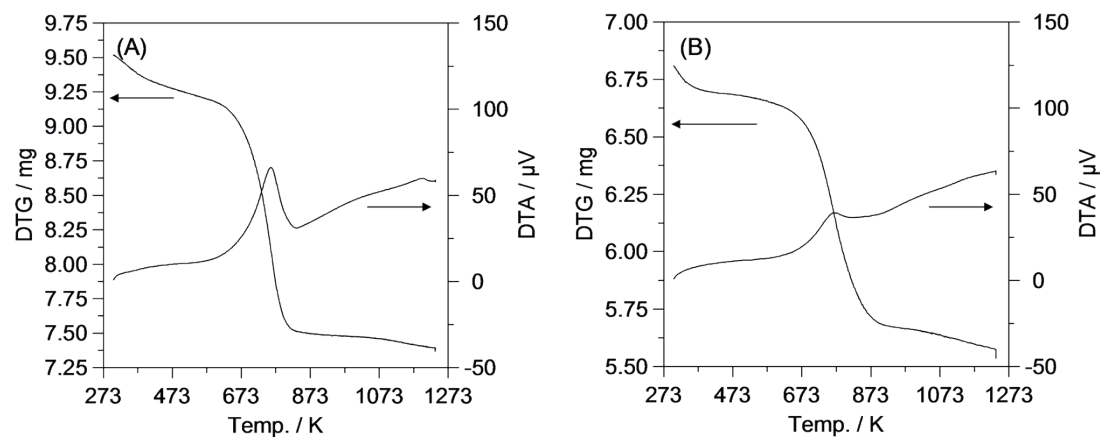

**Figure S5.** TG analysis of (A)  $\text{WO}_3/\text{Al}_2\text{O}_3$  with 20 wt%  $\text{WO}_3$  loading and (B) H-ZSM-5(90) catalysts after reaction for 5 h under flowing  $\text{O}_2$ .



7. NH<sub>3</sub>-TPD profiles of WO<sub>3</sub>/Al<sub>2</sub>O<sub>3</sub> and H-ZSM-5 before and after the reaction under N<sub>2</sub> and O<sub>2</sub>.

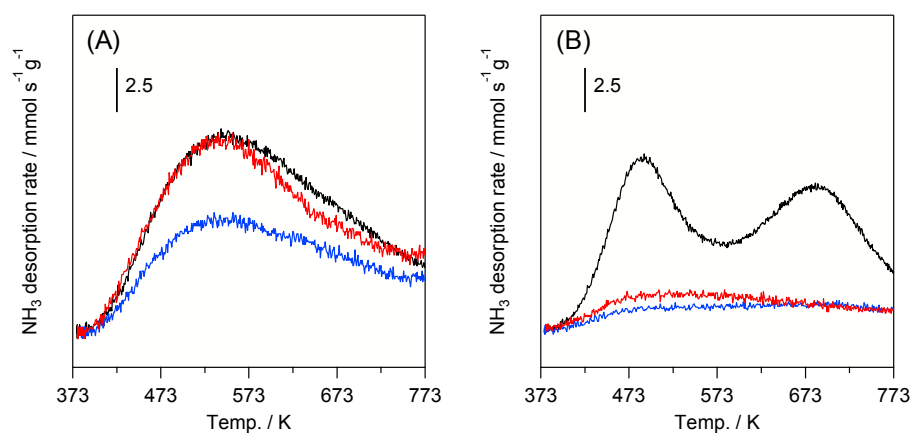

**Figure S6.** NH<sub>3</sub>-TPD profiles of (A) 20 wt% WO<sub>3</sub>/Al<sub>2</sub>O<sub>3</sub> and (B) H-ZSM-5(90). —: flesh, —: after the reaction under N<sub>2</sub> flow and —: after reaction under O<sub>2</sub> flow.

## 8. Previous studies on gas-phase dehydration of polyols

**Table S1.** Comparison of reaction results on gas-phase dehydration of polyols.

| Catalyst                                                                  | Catalyst weight / mg | Substrate       | Fed rate / mL h <sup>-1</sup> | Carrier        | Temp. / K | Main product                | Yield (%) at |             | Yield ratio (5 h / 1 h) | Reference |
|---------------------------------------------------------------------------|----------------------|-----------------|-------------------------------|----------------|-----------|-----------------------------|--------------|-------------|-------------------------|-----------|
|                                                                           |                      |                 |                               |                |           |                             | 1 h          | 5 h         |                         |           |
| 20 wt% WO <sub>3</sub> /Al <sub>2</sub> O <sub>3</sub>                    | 100                  | Glycerol        | 0.37                          | N <sub>2</sub> | 588       | Acrolein                    | 85           | 72          | 0.84                    | This Work |
| 20 wt% WO <sub>3</sub> /Al <sub>2</sub> O <sub>3</sub>                    | 100                  | Glycerol        | 0.37                          | O <sub>2</sub> | 588       | Acrolein                    | 93           | 90          | 0.97                    | This Work |
| H-ZSM-5 (SiO <sub>2</sub> /Al <sub>2</sub> O <sub>3</sub> =90)            | 100                  | Glycerol        | 0.37                          | N <sub>2</sub> | 588       | Acrolein                    | 90           | 45          | 0.50                    | This Work |
| Nb <sub>2</sub> O <sub>5</sub> (Cal. 673 K)                               | 570                  | Glycerol        | 50.4                          | N <sub>2</sub> | 588       | Acrolein                    | 37           | 47          | 1.27                    | S2        |
| Nb <sub>2</sub> O <sub>5</sub> (Cal. 973 K)                               | 840                  | Glycerol        | 50.4                          | N <sub>2</sub> | 588       | Acrolein                    | 10           | 11          | 1.10                    | S2        |
| H-ZSM-5 (SiO <sub>2</sub> /Al <sub>2</sub> O <sub>3</sub> =90)            | 380                  | Glycerol        | 50.4                          | N <sub>2</sub> | 588       | Acrolein                    | 32 (1–2 h)   | 14 (9–10 h) | 0.44                    | S3        |
| 15 wt% WO <sub>3</sub> /Al <sub>2</sub> O <sub>3</sub>                    | 310                  | Glycerol        | 0.37                          | N <sub>2</sub> | 588       | Acrolein                    | 46           | 68          | 1.48                    | S4        |
| 15 wt% WO <sub>3</sub> /ZrO <sub>3</sub>                                  | 630                  | Glycerol        | 0.37                          | N <sub>2</sub> | 588       | Acrolein                    | 53           | 63          | 1.19                    | S4        |
| 23 wt% WO <sub>3</sub> /SiO <sub>2</sub>                                  | 330                  | Glycerol        | 0.37                          | N <sub>2</sub> | 588       | Acrolein                    | 47           | 30          | 0.64                    | S4        |
| MFI zeolite (SiO <sub>2</sub> /Al <sub>2</sub> O <sub>3</sub> =14)        | 150                  | Glycerol        | 1.33                          | N <sub>2</sub> | 578       | Acrolein                    | 20           | 6           | 0.30                    | S5        |
| MFI zeolite (SiO <sub>2</sub> /Ga <sub>2</sub> O <sub>3</sub> =23)        | 150                  | Glycerol        | 1.33                          | N <sub>2</sub> | 578       | Acrolein                    | 13           | 6           | 0.46                    | S5        |
| BPO <sub>4</sub>                                                          | 220                  | 1,2-Propanediol | 0.53                          | H <sub>2</sub> | 493       | Propanal                    | 90           | 75          | 0.83                    | S6        |
| 30 wt% H <sub>4</sub> SiW <sub>12</sub> O <sub>40</sub> /SiO <sub>2</sub> | 300                  | 1,2-Propanediol | 1.70                          | N <sub>2</sub> | 473       | Propanal                    | 67 (Average) | -           | -                       | S7        |
| SiO <sub>2</sub> -Si <sub>2</sub> O <sub>3</sub>                          | 300                  | 1,2-Propanediol | 1.70                          | N <sub>2</sub> | 523       | Propanal                    | 29 (Average) | -           | -                       | S7        |
| ZrO <sub>2</sub>                                                          | 300                  | 1,2-Propanediol | 1.70                          | N <sub>2</sub> | 673       | Propanal                    | 21 (Average) | -           | -                       | S7        |
| TiO <sub>2</sub>                                                          | 300                  | 1,2-Propanediol | 1.70                          | N <sub>2</sub> | 623       | Acetone                     | 22 (Average) | -           | -                       | S7        |
| Amberlyst-15                                                              | 300                  | 1,2-Propanediol | 1.70                          | N <sub>2</sub> | 473       | Dioxolane                   | 49 (Average) | -           | -                       | S7        |
| Al <sub>2</sub> O <sub>3</sub>                                            | 300                  | 1,2-Propanediol | 1.70                          | N <sub>2</sub> | 573       | Dioxolane                   | 28 (Average) | -           | -                       | S7        |
| CeO <sub>2</sub>                                                          | 150                  | Glycerol        | 2.01                          | N <sub>2</sub> | 698       | 1-hydroxy-2-propanone       | 28 (Average) | -           | -                       | S8        |
| CeO <sub>2</sub>                                                          | 150                  | 1,2-Butanediol  | 2.01                          | N <sub>2</sub> | 698       | Butanal                     | 8 (Average)  | -           | -                       | S8        |
| CeO <sub>2</sub>                                                          | 150                  | 1,3-Butanediol  | 2.01                          | N <sub>2</sub> | 698       | 3-buten-2-ol                | 46 (Average) | -           | -                       | S8        |
| CeO <sub>2</sub>                                                          | 150                  | 1,4-Butanediol  | 2.01                          | N <sub>2</sub> | 698       | 3-buten-1-ol                | 40 (Average) | -           | -                       | S8        |
| CeO <sub>2</sub>                                                          | 150                  | 2,3-Butanediol  | 2.01                          | N <sub>2</sub> | 698       | Butanone                    | 33 (Average) | -           | -                       | S8        |
| CeO <sub>2</sub>                                                          | 150                  | 1,2-Propanediol | 2.01                          | N <sub>2</sub> | 698       | 1-Propanol                  | 9 (Average)  | -           | -                       | S8        |
| CeO <sub>2</sub>                                                          | 150                  | 1,3-Propanediol | 2.01                          | N <sub>2</sub> | 698       | 2-Propen-1-ol               | 42 (Average) | -           | -                       | S8        |
| CeO <sub>2</sub>                                                          | 150                  | 2,4-Pentanediol | 2.01                          | N <sub>2</sub> | 698       | <i>trans</i> -3-penten-2-ol | 59 (Average) | -           | -                       | S8        |
| In <sub>2</sub> O <sub>3</sub>                                            | 500                  | 1,3-propanediol | 2.67                          | N <sub>2</sub> | 648       | 2-propen-1-ol               | 72           | 22          | 0.31                    | S9        |
| In <sub>2</sub> O <sub>3</sub>                                            | 500                  | 1,4-butanediol  | 2.67                          | N <sub>2</sub> | 648       | 3-buten-1-ol                | 56           | 56          | 1.00                    | S9        |

## References

- S1. C. A. Emeis, *J. Catal.*, 1993, **141**, 347–354.
- S2. S. Chai, H. Wang, Y. Liang and B. Xu, *J. Catal.*, 2007, **250**, 342–349.
- S3. S.-H. Chai, H.-P. Wang, Y. Liang and B.-Q. Xu, *Green Chem.*, 2007, **9**, 1130–1136.
- S4. S.-H. Chai, B. Yan, L.-Z. Tao, Y. Liang and B.-Q. Xu, *Catal. Today*, 2014, **234**, 215–222.
- S5. L. H. Vieira, K. T. G. Carvalho, E. A. Urquieta-González, S. H. Pulcinelli, C. V. Santilli and L. Martins, *J. Mol. Catal. Chem.*, 2016, **422**, 148–157.
- S6. R. Otomo, C. Yamaguchi, D. Iwaisako, S. Oyamada and Y. Kamiya, *ACS Sustain. Chem. Eng.*, 2019, **7**, 3027–3033.
- S7. K. Mori, Y. Yamada and S. Sato, *Appl. Catal. Gen.*, 2009, **366**, 304–308.
- S8. S. Sato, R. Takahashi, T. Sodesawa and N. Honda, *J. Mol. Catal. Chem.*, 2004, **221**, 177–183.
- S9. M. Segawa, S. Sato, M. Kobune, T. Sodesawa, T. Kojima, S. Nishiyama and N. Ishizawa, *J. Mol. Catal. Chem.*, 2009, **310**, 166–173.
